# Supplementary material
Source: PubMed Central journal article supplement (PMC3020771)
Supplement: supp_M110.174946_jbc.M110.174946-1.pdf [file supp_M110.174946_jbc.M110.174946-1.pdf]

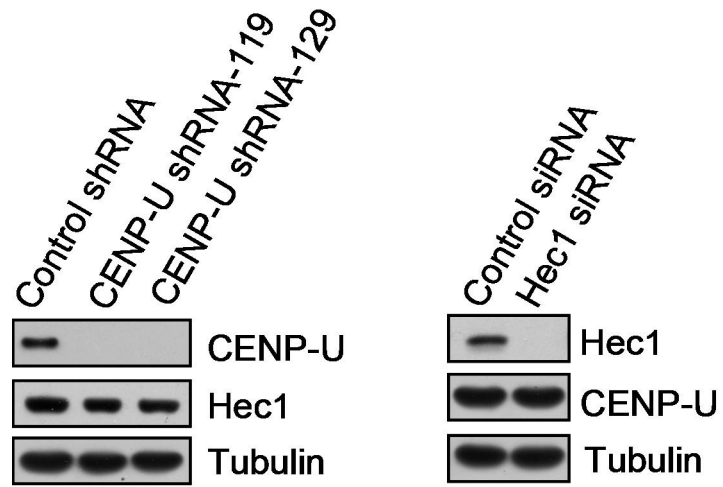

**Figure S1. HeLa cells treated with indicated shRNA or siRNA oligonucleotides were collected for analyses of specificity and efficiency. CENP-U shRNA positive cells were selected with puromycin.**

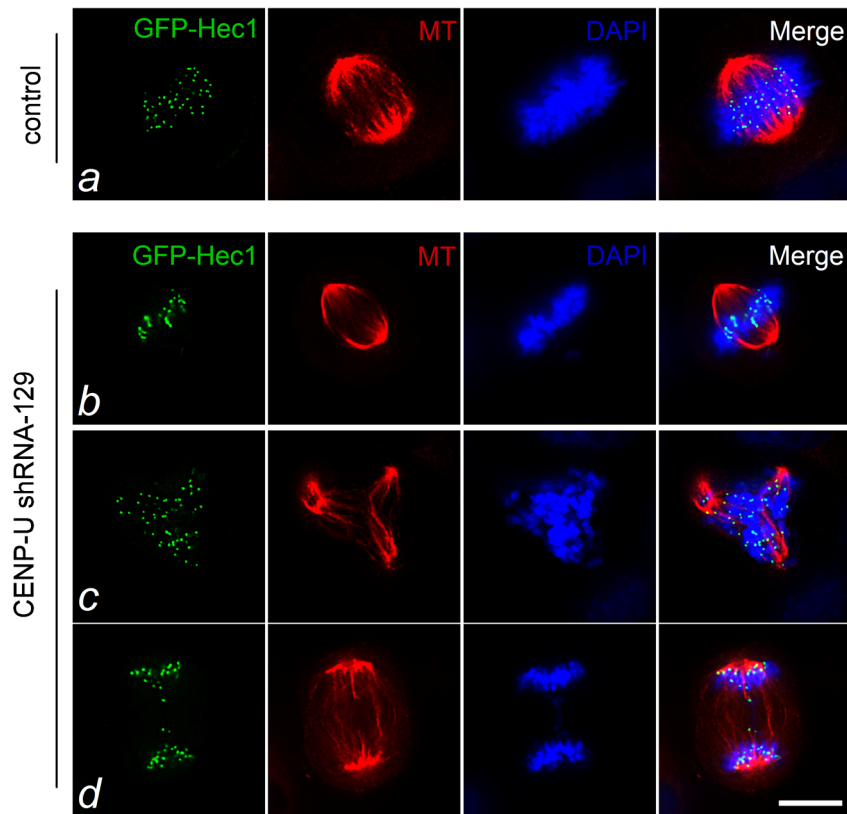

**Figure S2. Suppression of CENP-U causes multiple mitotic defects.** HeLa cells were transfected with CENP-U shRNA-129 along with GFP-Hec1 as a marker of transfection and examined for spindle and DNA morphology. After 48 hrs transfection, cells were fixed and stained with tubulin (*red*) and DAPI (*blue*). The following phenotypes were observed in the absence of CENP-U: chromosome misalignment (*b*), multipolar spindle (*c*), chromosome bridge in anaphase (*d*). Bar: 10  $\mu$ m.

**A**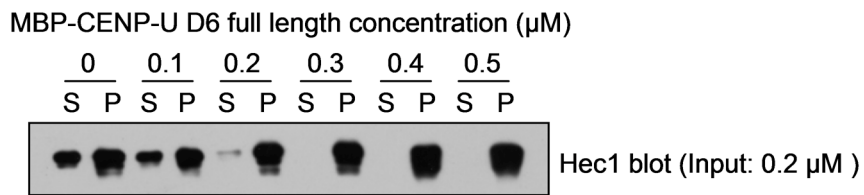**B**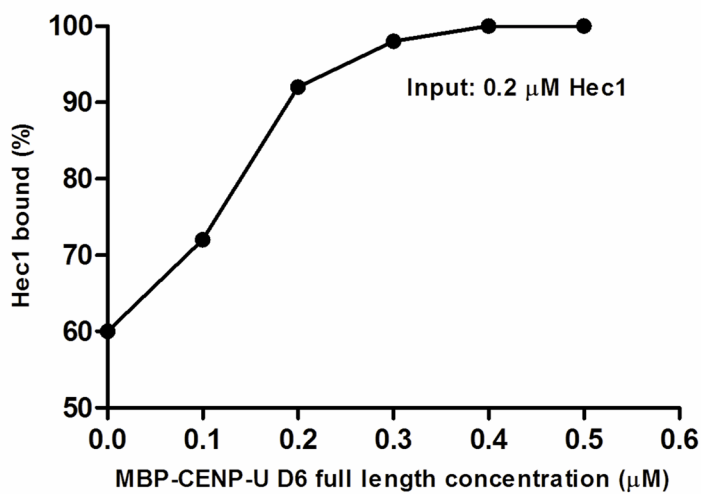

**Figure S3. Hec1 microtubule binding affinity was enhanced in the presence of increasing concentrations of CENP-U.**

**A.** A constant concentration of Hec1 (0.2  $\mu\text{M}$ ) and microtubules (1  $\mu\text{M}$ ) were sedimented with increasing concentrations of MBP-CENP-U D6 (0-0.5 $\mu\text{M}$ ), and the supernatant and pellet samples were analysed by anti-Hec1 blot.

**B.** Plot of quantifications of the aforementioned MT cosedimentation assay.

GFP-CENP-U DD + mcherry-H2B

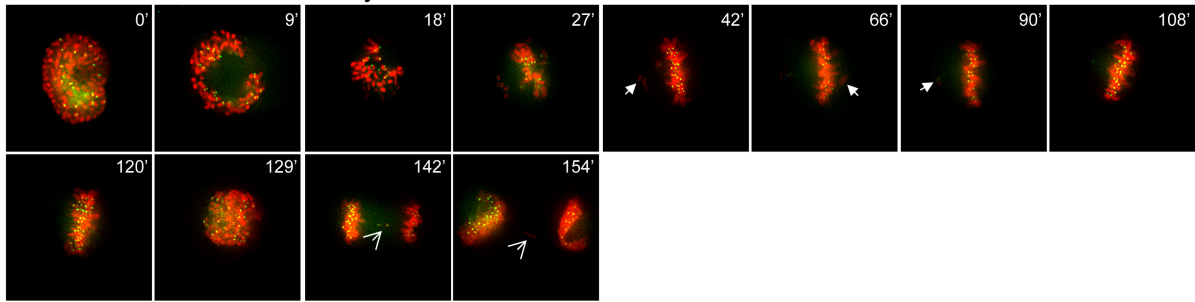

**Figure S4. Real-time imaging of chromosome movements in HeLa cells co-transfected with mcherry-H2B and GFP-CENP-U DD.** Chromosomes were marked by mcherry-H2B. Closed arrows indicate lagging chromosomes during alignment; open arrows indicate chromosome bridge in anaphase. Bar: 10  $\mu$ m.
